# Supplementary material
Source: Research Square preprint supplement (doi:10.21203/rs.3.rs-8736173/v1)
Supplement: Supplementary file 1 [file 758d3b1d345ef7ce08199f6b.docx]

**Innovative Approaches to Educational Rehabilitation for Students with Intellectual Disabilities in Saudi Arabia: Bridging Gaps and Overcoming Barriers**

**Table S1 : Reliability Test analysis of ID I questionnaires (Items = 10)**

| **Reliability Statistical analysis of**  **ID 1 Training and instructional design questions** | | | | |
| --- | --- | --- | --- | --- |
| 1. **Case Processing Summary** | N | % |  |  |
| Valid | 298 | 100.0 |  |  |
| Excludeda | 0 | .0 |  |  |
| Total | 243 | 100.0 |  |  |
| a. Listwise deletion based on all variables in the procedure | |  |  |  |
| 1. **Reliability Statistics** |  |  |  |  |
| Cronbach's Alpha 0.856 | N of Items 10 |  |  |  |
| **( c) Item-Total Statistics** |  |  |  |  |
|  | Scale Mean if Item Deleted | Scale Variance if Item Deleted | Corrected Item-Total Correlation | Cronbach's Alpha if Item Deleted |
| How aware are you of the current educational rehabilitation programs for students with intellectual disabilities in Saudi Arabia? | 33.4897 | 45.945 | .545 | .816 |
| How aware are you of the current educational rehabilitation programs for students with intellectual disabilities in Saudi Arabia? | 33.6132 | 45.974 | .527 | .817 |
| How effective do you believe the current educational rehabilitation programs are for students with intellectual disabilities? | 33.8765 | 46.662 | .526 | .818 |
| To what extent do you think educational rehabilitation programs address the needs of students with intellectual disabilities in Saudi Arabia? | 33.5926 | 46.391 | .529 | .817 |
| How important do you believe it is to integrate innovative approaches in the rehabilitation of students with intellectual disabilities? | 33.4691 | 44.696 | .612 | .810 |
| How confident are you in the ability of teachers to provide effective educational rehabilitation for students with intellectual disabilities in Saudi Arabia? | 33.2757 | 44.275 | .598 | .811 |
| How satisfied are you with the availability of resources for the education of students with intellectual disabilities in Saudi Arabia? | 33.4198 | 44.559 | .613 | .809 |
| How well do you think educational rehabilitation programs support the long-term development of students with intellectual disabilities? | 33.5185 | 46.763 | .479 | .822 |
| How often do you believe educational institutions in Saudi Arabia collaborate with other sectors (e.g., healthcare, social services) to support students with intellectual disabilities? | 33.6132 | 45.742 | .528 | .817 |
| How important is it for educational institutions to involve families in the rehabilitation | 33.4527 | 45.505 | .584 | .812 |
|  | 35.1728 | 55.325 | -.052 | .855 |

**Table S2 : Reliability Test analysis of ID 2 questionnaires (Items = 10)**

| **Reliability Statistical analysis of** **ID2 Practical Application, Equity and Accessibility** | | | | |
| --- | --- | --- | --- | --- |
| 1. **Case Processing Summary** | N | % |  |  |
| Valid | 298 | 99.6 |  |  |
| Excludeda | 1 | .4 |  |  |
| Total | 244 | 100.0 |  |  |
| a. Listwise deletion based on all variables in the procedure | |  |  |  |
| 1. **Reliability Statistics** |  |  |  |  |
| Cronbach's Alpha 0.849 | N of Items 10 |  |  |  |
| **( c) Item-Total Statistics** |  |  |  |  |
|  | Scale Mean if Item Deleted | Scale Variance if Item Deleted | Corrected Item-Total Correlation | Cronbach's Alpha if Item Deleted |
| How much do you think the lack of trained educators affects the success of educational rehabilitation programs for students with intellectual disabilities? | 31.5473 | 44.174 | .451 | .843 |
| How significant do you think financial constraints are in limiting the effectiveness of rehabilitation programs in Saudi Arabia? | 31.8519 | 41.945 | .511 | .838 |
| How often do you believe that students with intellectual disabilities face barriers related to physical accessibility in educational settings? | 32.1811 | 42.413 | .533 | .836 |
| How often do you think cultural attitudes towards intellectual disabilities hinder the success of rehabilitation programs? | 31.8724 | 41.550 | .586 | .831 |
| How much do you believe that the lack of awareness among parents about available educational services affects the rehabilitation of students with intellectual disabilities? | 31.6749 | 40.642 | .650 | .825 |
| How much do you think the limited availability of specialized technologies hinders the education of students with intellectual disabilities? | 31.6049 | 39.364 | .636 | .826 |
| How frequently do you believe that the lack of a comprehensive policy framework for intellectual disability education creates barriers in Saudi Arabia? | 31.6420 | 40.313 | .624 | .827 |
| How significant is the issue of social stigma in preventing the full participation of students with intellectual disabilities in educational programs? | 31.7284 | 43.356 | .436 | .844 |
| How much do you think the lack of collaboration between schools and rehabilitation centers affects the educational outcomes of students with intellectual disabilities? | 31.7819 | 42.799 | .479 | .841 |
| How effective do you believe the current educational rehabilitation programs are for students with intellectual disabilities? | 31.7078 | 41.373 | .571 | .833 |
|  | 31.5473 | 44.174 | .451 | .843 |

**Table S3 : Reliability Test analysis of ID 3 questionnaires (Items = 10)**

| **Reliability Statistical analysis of** **ID3 Impact on students** | | | | |
| --- | --- | --- | --- | --- |
| 1. **Case Processing Summary** | N | % |  |  |
| Valid | 298 | 99.2 |  |  |
| Excludeda | 2 | .8 |  |  |
| Total | 245 | 100.0 |  |  |
| a. Listwise deletion based on all variables in the procedure | |  |  |  |
| 1. **Reliability Statistics** |  |  |  |  |
| Cronbach's Alpha 0.836 | N of Items 10 |  |  |  |
| **( c) Item-Total Statistics** |  |  |  |  |
|  | Scale Mean if Item Deleted | Scale Variance if Item Deleted | Corrected Item-Total Correlation | Cronbach's Alpha if Item Deleted |
| How likely are you to support the implementation of personalized learning plans for students with intellectual disabilities? | 31.6872 | 41.778 | .566 | .817 |
| How effective do you believe the use of assistive technologies (e.g., speech-to-text, interactive learning tools) could be in supporting students with intellectual disabilities? | 31.8025 | 43.267 | .448 | .828 |
| How interested are you in the integration of virtual learning environments to support students with intellectual disabilities? | 32.0165 | 45.082 | .325 | .839 |
| How confident are you in the potential of collaborative approaches involving schools, families, and communities to improve rehabilitation for students with intellectual disabilities? | 31.8066 | 42.091 | .545 | .819 |
| How important do you think training teachers in innovative teaching strategies (e.g., Universal Design for Learning) is for the education of students with intellectual disabilities? | 31.6584 | 40.672 | .628 | .811 |
| How likely do you think the introduction of specialized educational apps and games will help in the rehabilitation of students with intellectual disabilities? | 31.5638 | 39.925 | .607 | .813 |
| How beneficial do you think offering parent support and education programs will be for improving the rehabilitation outcomes of students with intellectual disabilities? | 31.7778 | 42.967 | .462 | .827 |
| How well do you think the inclusion of job readiness training in rehabilitation programs will support the transition of students with intellectual disabilities into the workforce? | 31.6543 | 40.277 | .621 | .812 |
| How optimistic are you about the future of educational rehabilitation for students with intellectual disabilities in Saudi Arabia? | 31.8724 | 42.145 | .491 | .825 |
| How likely do you think it is that innovations in artificial intelligence (AI) and machine learning will improve educational rehabilitation for students with intellectual disabilities? | 31.6420 | 41.553 | .579 | .816 |
|  |  |  |  |  |
